# Supplementary material for: Polymeric Nanoparticles as Oral and Intranasal Peptide Vaccine Delivery Systems: The Role of Shape and Conjugation
Source: MDPI journal article supplement (doi:10.3390/vaccines12020198), 2024-02-15
Supplement: s1 [file s1]

# **Polymeric Nanoparticles as Oral and Intranasal Peptide Vaccine Delivery Systems: The Role of Shape and Conjugation**

Prashamsa Koirala <sup>1</sup>, Ahmed O. Shalash <sup>1</sup>, Sung-Po R. Chen <sup>2</sup>, Mohammad O. Faruck <sup>1</sup>,  
Jingwen Wang <sup>1</sup>, Waleed M. Hussein <sup>1</sup>, Zeinab G. Khalil <sup>3</sup>, Robert J. Capon <sup>3</sup>,  
Michael J. Monteiro <sup>2</sup>, Istvan Toth <sup>1,4,\*</sup> and Mariusz Skwarczynski <sup>1,\*</sup>

<sup>1</sup> School of Chemistry and Molecular Biosciences, The University of Queensland,  
Brisbane, QLD 4072, Australia

<sup>2</sup> Australian Institute of Bioengineering and Nanotechnology, The University of Queensland,  
Brisbane, QLD 4072, Australia

<sup>3</sup> Institute for Molecular Bioscience, The University of Queensland, St Lucia, QLD 4072,  
Australia

<sup>4</sup> School of Pharmacy, The University of Queensland, Woolloongabba, QLD 4102, Australia

\* Correspondence: i.toth@uq.edu.au (I.T.); m.skwarczynski@uq.edu.au (M.S.)

**Table S1.** Size and PDI of nanoparticles analysed by DLS. Characterizations of **rods** and **worms** alone, in the mixture and as the conjugates are adopted from the published report.[1]

| <b>Nanoparticles</b> | <b>Detected size</b>                            | <b>PDI</b>      |
|----------------------|-------------------------------------------------|-----------------|
| <b>Sphere</b>        | $90 \pm 5$                                      | $0.16 \pm 0.01$ |
| <b>Sphere+PJ8</b>    | $460 \pm 11$                                    | $0.12 \pm 0.04$ |
| <b>Sphere-PJ8</b>    | $490 \pm 8$                                     | $0.14 \pm 0.01$ |
| <b>Rods</b>          | $70 \pm 25$ ; $330 \pm 20$ ; $4,340 \pm 10$     | $0.30 \pm 0.01$ |
| <b>Rods+PJ8</b>      | $78 \pm 12$ ; $440 \pm 30$ ; $2,000 \pm 1,000$  | $0.30 \pm 0.05$ |
| <b>Rods-PJ8</b>      | $66 \pm 6$ ; $450 \pm 20$ ; $4,800 \pm 400$     | $0.40 \pm 0.01$ |
| <b>Worms</b>         | $350 \pm 9$ ; $2,650 \pm 10$                    | $0.40 \pm 0.04$ |
| <b>Worms+PJ8</b>     | $600 \pm 22$ ; $5,000 \pm 400$                  | $0.30 \pm 0.03$ |
| <b>Worms-PJ8</b>     | $550 \pm 10$ ; $4,000 \pm 2000$                 | $0.40 \pm 0.03$ |
| <b>Tadpoles</b>      | $200 \pm 40$ ; $1,900 \pm 100$ ; $4,380 \pm 40$ | $0.27 \pm 0.01$ |
| <b>Tadpoles+PJ8</b>  | $200 \pm 4$                                     | $0.20 \pm 0.01$ |
| <b>Tadpoles-PJ8</b>  | $190 \pm 7$                                     | $0.21 \pm 0.01$ |

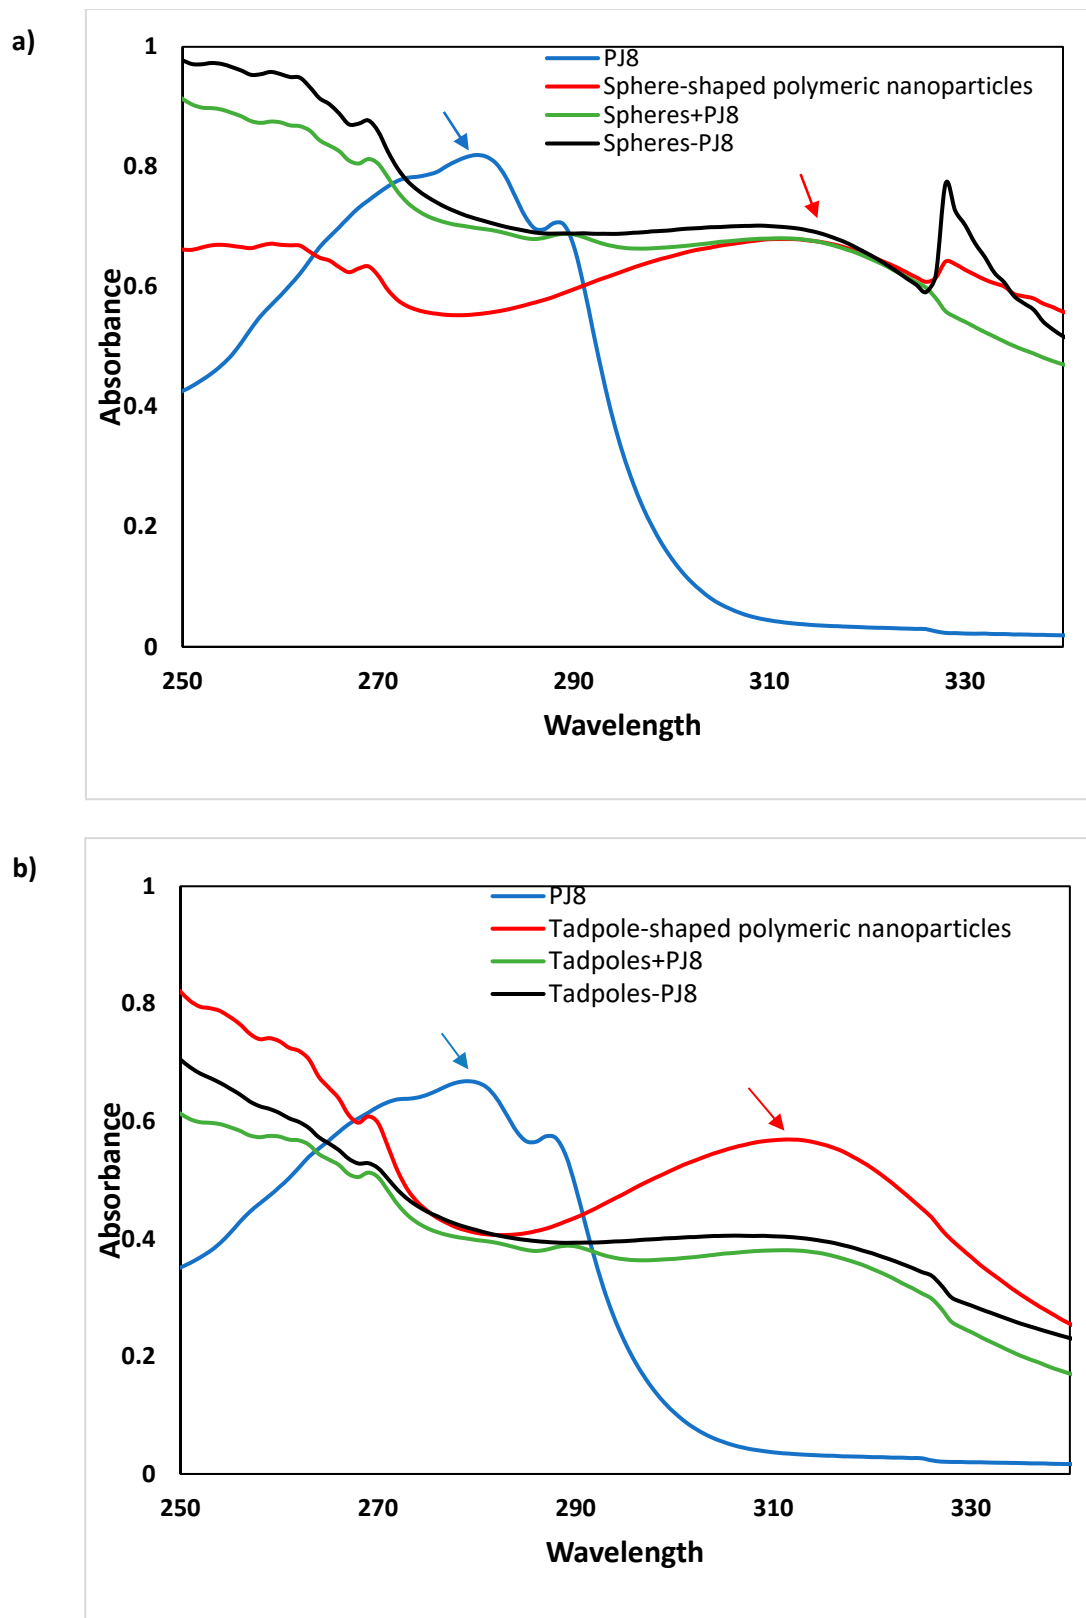

**Figure S1.** UV absorbance of a) **PJ8**, **spheres** polymeric nanoparticles, **spheres-PJ8**, **spheres+PJ8**; and b) **PJ8**, **tadpoles** polymeric nanoparticles, **tadpoles-PJ8**, **tadpoles+PJ8** from 200 nm to 350 nm. Blue arrows denote the absorbance peak observed at 280 nm and red arrows denote the absorbance peak observed at 312 nm.

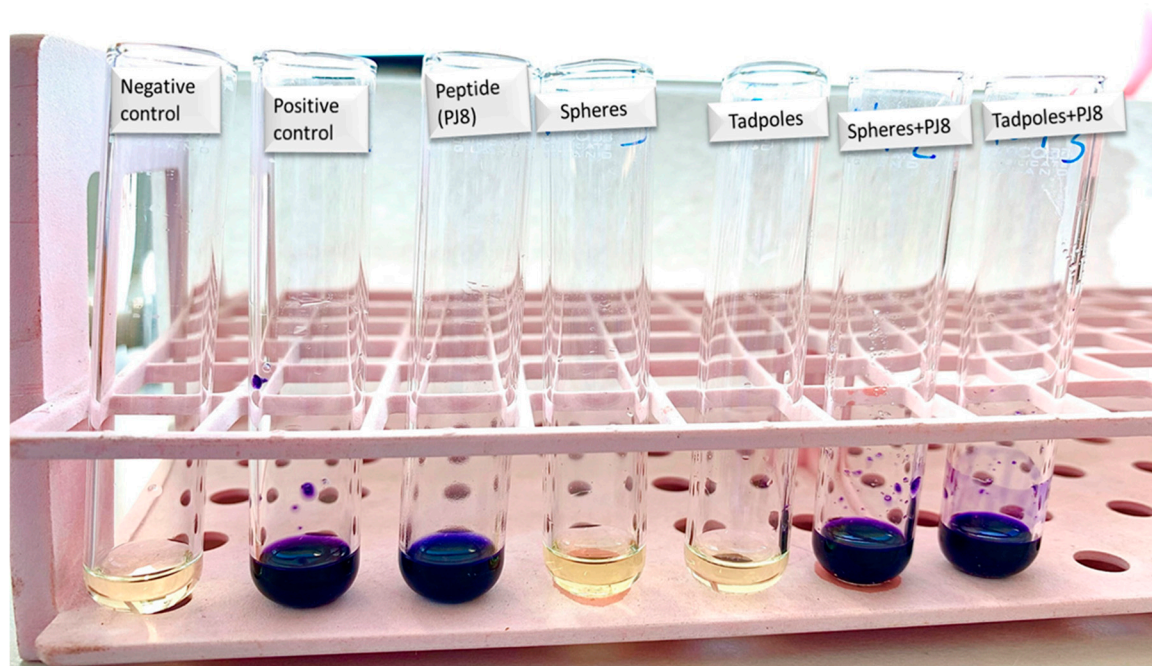

**Figure S2.** Ninhydrin staining test to confirm the formation of **spheres-PJ8** and **tadpoles-PJ8**.

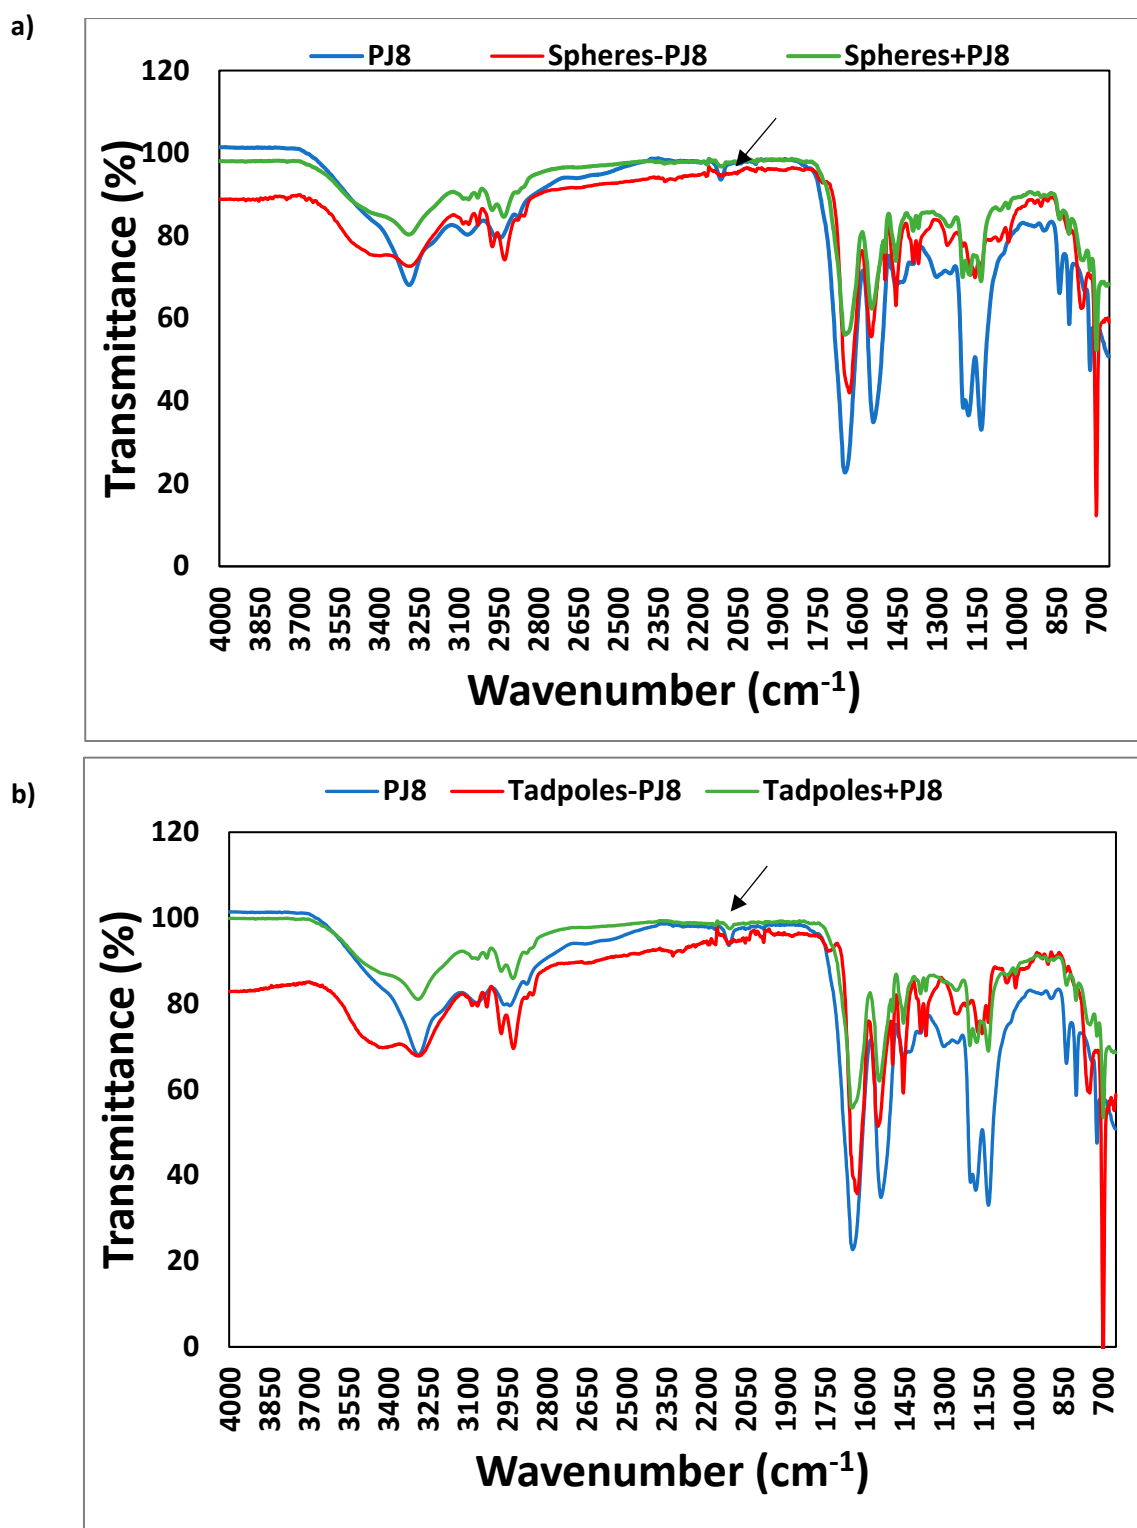

**Figure S3.** IR spectrum of a) Azide functionalised **PJ8**, **sphere** polymeric nanoparticles, and **spheres+PJ8** b) Azide functionalised **PJ8**, **tadpole** polymeric nanoparticles, and **tadpole+PJ8**. Arrows denote a characteristic azido stretching vibration observed at  $2111\text{ cm}^{-1}$  for azide functionalised **PJ8** and the physical mixture of **PJ8** and **spheres** and **tadpoles**.

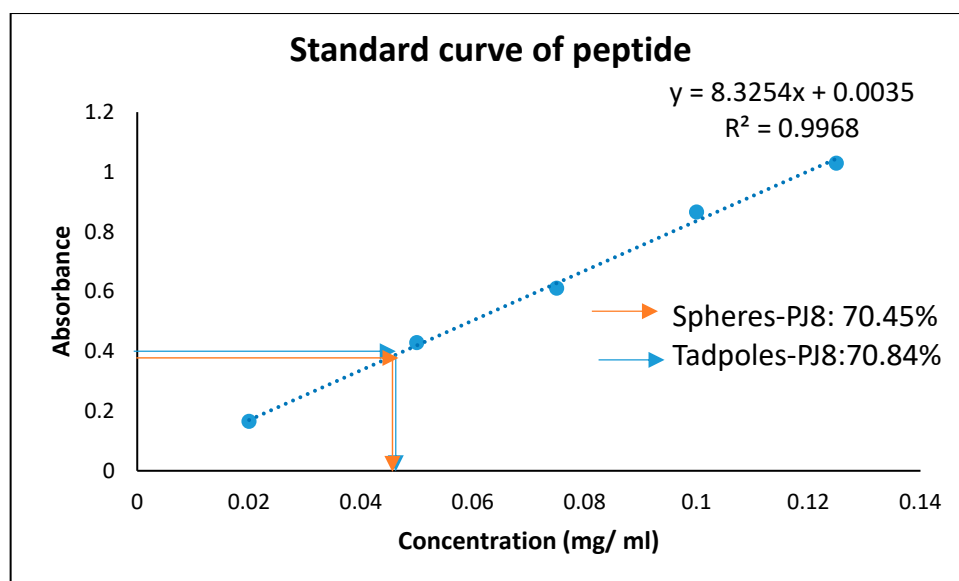

**Figure S4.** Quantification of **PJ8** conjugated to **sphere** and **tadpole** polymeric nanoparticles via BCA assay.

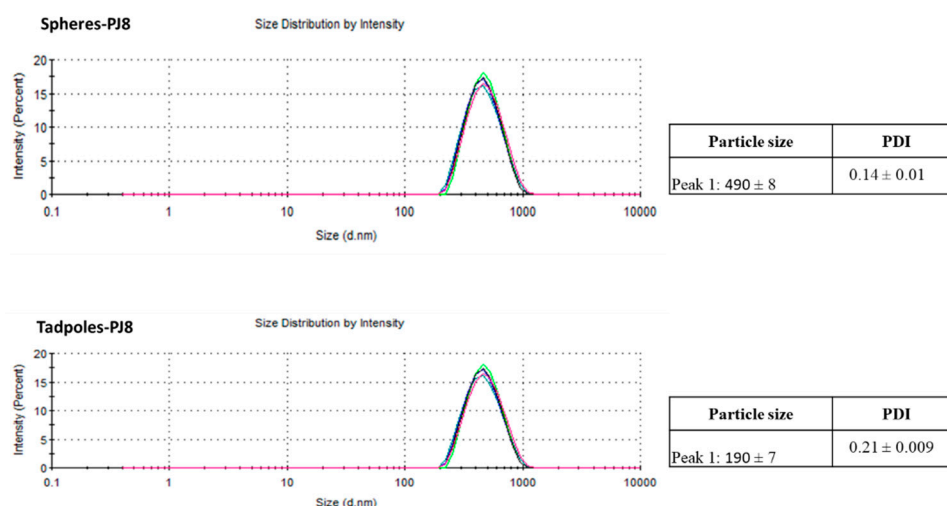

**Figure S5.** DLS spectra of particles **spheres-PJ8** and **tadpoles-PJ8**, size distributions by intensity.

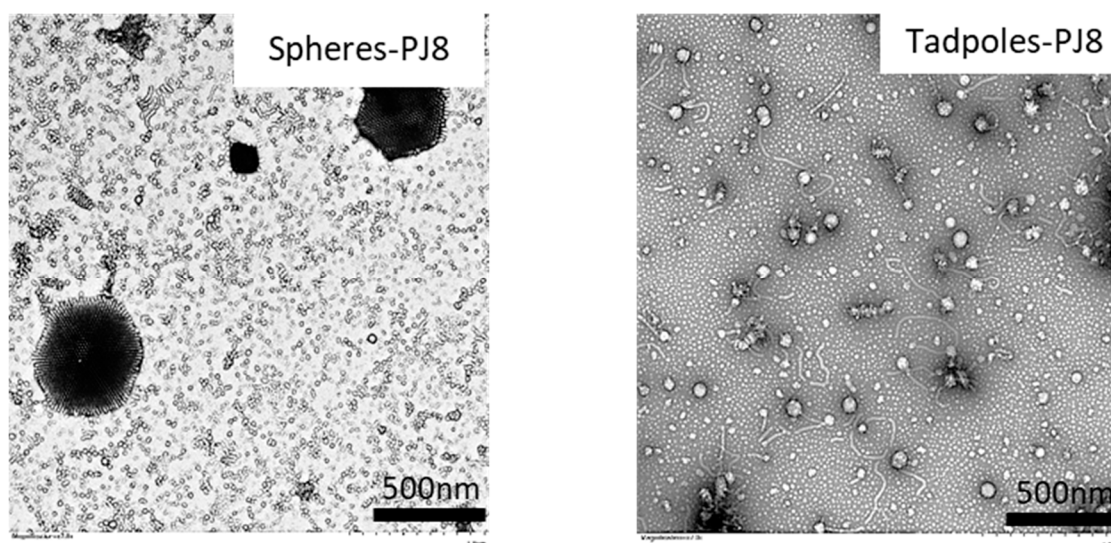

**Figure S6.** The nanoparticles' morphology examined by transmission electron microscopy. TEM images of **spheres-PJ8** and **tadpoles-PJ8** at 0.1 mg/mL. The samples were treated with 2% uranyl acetate as a negative stain (scale bars: 500 nm).

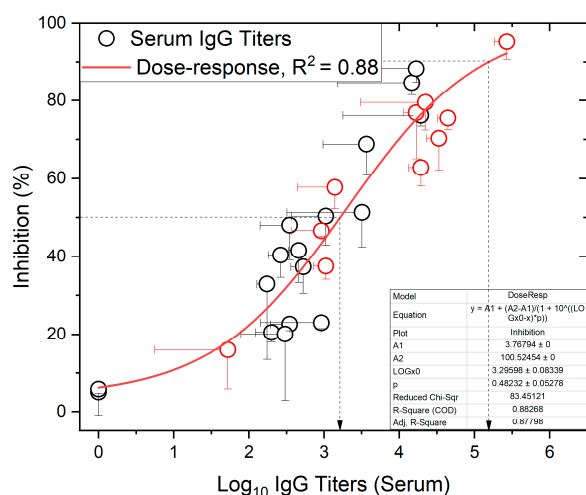

**Figure S7.** The relationship between anti-J8 IgG titers in sera of mice and opsonization/bactericidal activity against cultured GAS bacteria (GC2203 strain). The data were fitted to a sigmoidal relationship, gave  $R^2$  of 0.88. Red circles denote subcutaneous immunization,[1] while black circles denote intranasal and oral immunization. Dashed arrows represent the interpolated  $IC_{50}$  and  $IC_{90}$  titer values from the fitted curve.

1. Koirala, P.; Chen, S.-P.R.; Boer, J.C.; Khalil, Z.G.; Deceneux, C.; Goodchild, G.; Lu, L.; Faruck, M.O.; Shalash, A.O.; Bashiri, S., et al. Polymeric Nanoparticles as a Self-Adjuvanting Peptide Vaccine Delivery System: The Role of Shape. *Adv. Funct. Mater.* **2023**, <https://doi.org/10.1002/adfm.202209304>, 2209304, doi:<https://doi.org/10.1002/adfm.202209304>.
